# Supplementary material for: A type I IFN-dependent DNA damage response regulates the genetic program and inflammasome activation in macrophages
Source: eLife. 2017 Mar 31;6:e24655. doi: 10.7554/eLife.24655 (PMC5409825; doi:10.7554/eLife.24655)
Supplement: Figure 5—source data 1. — Normalized log2 probe values for genes up-regulated (≥4 fold, adj. p-value<0.001) in L. m.-infected Lyz2Cre/+and Scid:Atm C/C:Lyz2Cre/+ BMDMs relative to uninfected cells. The fold-change between infected Scid:Atm C/C:Lyz2Cre/+-and infected Lyz2Cre/+ cells for each gene is also shown. DOI: http://dx.doi.org/10.7554/eLife.24655.012 [file elife-24655-fig5-data1.xlsx]

## Sheet: SuppTable
Table 1. Normalized log2 probe values for genes upregulated (>4 fold-change, adj. p-value < 0.001) in L.M. infected cells relative to uninfected cells. The fold-change between ATM/SCID and WT infected cells for each gene is also shown.
PROBE	SYMBOL	TargetID	WT.NOINF.1	WT.NOINF.2	ATM_SCID.NOINF.1	ATM_SCID.NOINF.2	WT.Lys.1	WT.Lys.2	ATM_SCID.Lys.1	ATM_SCID.Lys.2	adj. p-value	WTvATM_SCID FC
ILMN_2734924	1190003J15Rik	1190003J15RIK	71.6859	87.3163	74.0436	93.8479	524.976	687.558	209.027	463.836	0.000201262	1.80205
ILMN_2625085	1700112C13Rik	1700112C13RIK	118.534	45.3105	111.952	83.9212	568.189	688.551	611.976	860.996	8.27127e-06	0.8532
ILMN_1234774	2010005H15Rik	2010005H15RIK	25.0915	54.5613	23.8975	22.917	333.341	829.135	163.633	192.517	0.000105986	3.264
ILMN_2599174	4933430I17Rik	4933430I17RIK	26.1076	22.8217	22.0816	29.3388	176.484	188.138	173.672	220.326	1.42854e-07	0.925442
ILMN_2959253	6030429G01Rik	6030429G01RIK	72.8525	81.2011	50.0985	115.596	270.961	281.12	344.547	405.25	1.51193e-05	0.736307
ILMN_2949217	9030625A04Rik	9030625A04RIK	152.832	130.893	129.588	178.21	1299.47	1085.75	1110.32	891.291	2.56599e-07	1.19165
ILMN_1217235	9130005N14Rik	9130005N14RIK	28.6257	84.5377	52.388	66.2119	293.564	245.029	310.284	280.2	1.87174e-05	0.91212
ILMN_2847437	A430084P05Rik	A430084P05RIK	28.923	20.5021	23.6738	34.4033	205.195	539.577	255.3	332.459	2.6425e-06	1.26714
ILMN_1234137	A530023O14Rik	A530023O14RIK	22.2778	23.4759	26.188	38.1137	224.348	430.873	256.997	201.446	1.10695e-06	1.42923
ILMN_1249864	A630077B13Rik	A630077B13RIK	44.3887	118.093	48.8388	146.837	736.334	739.439	802.614	693.478	3.92094e-06	0.986418
ILMN_3160750	AA467197	AA467197	841.681	100.416	911.205	123.243	5747.28	7648.76	4578.71	5401.57	0.000598959	1.34225
ILMN_3008733	AA960436	AA960436	1256.44	1219.17	1536.98	1399.33	6422.41	6271.89	5283.46	4869.39	1.71779e-06	1.25032
ILMN_2622671	Acsl1	ACSL1	177.076	95.0249	168.627	137.843	1227.24	961.269	929.82	1267.22	1.38667e-06	0.996115
ILMN_2589256	Adap2	ADAP2	186.018	205.994	190.313	342.411	877.926	987.165	858.786	727.261	4.24978e-06	1.17594
ILMN_3093622	Adar	ADAR	77.743	229.756	128.69	473.564	860.68	1104.09	851.522	899.32	0.000114528	1.12219
ILMN_3161790	AI451557	AI451557	114.788	184.776	155.979	382.818	997.19	1271.74	908.967	894.536	1.30547e-05	1.25807
ILMN_2695412	AI451617	AI451617	56.678	101.668	73.3835	513.532	1359.72	1614.38	1212.21	1297.53	2.33117e-05	1.18502
ILMN_1212938	Aif1	AIF1	2090.8	2123.28	2141.12	3448.39	11870.3	10033.5	11488	8717.89	1.86806e-06	1.08403
ILMN_1259290	Akt3	AKT3	73.0711	70.1921	69.1132	88.3287	379.24	394.671	270.108	275.985	3.08704e-06	1.41718
ILMN_1257020	Aldh1b1	ALDH1B1	90.0388	63.8184	89.5692	109.923	752.566	866.025	577.538	475.878	1.46192e-06	1.53652
ILMN_2962737	Aoah	AOAH	146.837	103.184	123.862	126.468	1968.99	1917.67	2188.57	2122.16	2.21748e-08	0.901624
ILMN_2622856	Apol9b	APOL9B	21.5532	25.2954	21.5487	46.1456	662.459	1084.46	590.757	630.07	1.41441e-07	1.43093
ILMN_2952275	Arg1	ARG1	36.3158	69.4349	29.0934	41.5088	4526.15	6518.25	2665.86	2715.61	1.32615e-07	2.0523
ILMN_3031781	Arid5b	ARID5B	32.5017	83.0075	40.208	78.7424	234.824	364.181	270.49	202.44	2.71741e-05	1.26658
ILMN_1247811	Ass1	ASS1	131.693	69.798	87.8834	85.1338	2052.34	1798.34	1490.13	1565.23	1.86145e-07	1.2603
ILMN_2619408	Atf3	ATF3	654.527	910.399	927.869	2567.27	5249.68	6247.63	3226.66	4719.01	0.000136956	1.44699
ILMN_2646985	Atf5	ATF5	471.865	371.877	359.081	347.093	1370.88	2179.74	1974.18	2998.82	1.67419e-05	0.713981
ILMN_2636403	Axud1	AXUD1	288.143	302.896	372.473	249.781	2363.79	3558.14	1308.55	1358.49	4.82193e-05	2.22042
ILMN_2733567	B430306N03Rik	B430306N03RIK	28.2773	37.3778	40.7823	81.2471	166.63	261.407	149.379	152.566	5.34466e-05	1.4176
ILMN_2761900	Batf	BATF	71.6286	56.9676	43.8413	49.4728	578.994	753.145	469.393	869.759	1.43574e-06	0.994763
ILMN_1230143	Batf2	BATF2	28.052	50.8437	55.9214	201.34	1066.09	1379.21	933.162	1033.52	6.39865e-06	1.24336
ILMN_1226639	BC006779	BC006779	147.525	297.739	265.104	763.473	2166.79	3048.88	1943.95	2347.03	2.33848e-05	1.2155
ILMN_2746681	BC013712	BC013712	149.146	572.515	230.541	905.553	3746.81	4017.62	3558.14	2405.57	3.0389e-05	1.30195
ILMN_2782841	BC050811	BC050811	65.4332	55.5529	54.5162	90.7307	281.91	339.691	345.594	311.252	1.02593e-06	0.946343
ILMN_3151243	BC094916	BC094916	22.8103	27.121	26.4022	110.827	1443.11	2420.34	1361.3	1201.22	5.85976e-07	1.50767
ILMN_2936165	Bcl2a1c	BCL2A1C	86.3581	47.5227	58.3968	51.4398	594.045	381.888	335.673	399.592	7.71199e-06	1.32732
ILMN_2749717	Bcl3	BCL3	64.2046	52.3151	49.6105	63.4978	308.034	408.74	349.637	391.212	4.24807e-07	0.967502
ILMN_2648346	Bst1	BST1	33.2876	47.7254	35.978	33.8741	517.613	669.971	627.459	463.211	6.01211e-08	1.08886
ILMN_1224110	Bst2	BST2	1232.79	2382.36	2559.25	4567.56	12375.1	8768.6	13344.1	9873.07	7.42791e-05	0.910695
ILMN_3162925	C130026I21Rik	C130026I21RIK	22.2464	44.9633	43.4334	42.7583	124.213	397.22	147.468	117.604	0.000476215	1.96713
ILMN_1255190	C1rl	C1RL	35.2883	36.0356	22.2201	36.6532	124.127	126.831	151.944	170.671	7.00605e-06	0.777886
ILMN_2759484	C3	C3	573.064	549.084	362.632	562.061	6198.31	8039.92	7830.82	10054.9	2.30187e-07	0.796067
ILMN_1249727	Car13	CAR13	651.343	505.886	651.027	529.532	5184.82	5124.99	4344.87	4355.15	1.32615e-07	1.18503
ILMN_2811737	Casp4	CASP4	776.279	495.402	725.392	775.396	4502.05	6342.48	4976.14	4645.63	4.39857e-07	1.12708
ILMN_1245710	Ccl2	CCL2	783.289	106.244	673.31	259.106	10010.8	13274.2	6438.65	5879.36	6.26333e-05	1.89032
ILMN_1253919	Ccl3	CCL3	1408.37	1118.34	1551.87	1810.14	24723.8	24227.2	8885.76	11176.8	2.13468e-05	2.43991
ILMN_1223257	Ccl4	CCL4	2548.79	3408.4	2963.47	4668.96	45883.3	44148.5	32770.7	32076.8	2.53768e-07	1.38836
ILMN_1231814	Ccl5	CCL5	157.662	165.199	293.463	349.852	36330.5	34016.6	37459.2	39200.2	1.603e-08	0.917658
ILMN_2835117	Ccl7	CCL7	1324.02	115.305	1334.3	297.907	18253.3	22531	14056.6	14547.5	0.000113817	1.42582
ILMN_2752624	Ccrl2	CCRL2	151.491	64.3179	99.2134	92.8179	1755.83	2138.73	709.931	1012.68	2.65647e-05	2.26085
ILMN_3160771	Cd200	CD200	22.6207	20.6436	22.1334	23.6184	241.995	244.657	83.1425	183.851	6.18312e-05	1.82271
ILMN_1226800	Cd274	CD274	899.545	241.16	959.849	459.448	27028.8	30019.2	20031.6	23496.9	9.92264e-07	1.31059
ILMN_2606144	Cd300lf	CD300LF	101.668	54.7773	55.5249	65.1255	743.271	812.456	292.898	265.324	0.000287151	2.78693
ILMN_3115796	Cd40	CD40	190.577	200.645	253.723	322.118	2547.01	2499.1	2039.82	1858.74	3.16449e-07	1.29435
ILMN_1248714	Cd55	CD55	26.9865	25.3494	21.1757	26.4589	176.719	117.29	99.8735	113.092	6.28747e-06	1.38054
ILMN_1218240	Cd69	CD69	200.805	113.467	108.78	93.5061	3695.16	4254.95	1960.63	1206.23	1.13989e-05	2.51041
ILMN_1216386	Cd86	CD86	129.091	30.3742	112.858	41.055	611.147	1646.6	842.533	1251.72	7.82065e-05	1.07807
ILMN_1239294	Cdc42ep2	CDC42EP2	212.496	91.4367	164.818	60.6776	861.496	549.853	739.439	679.284	0.000101899	0.994802
ILMN_1230853	Cfb	CFB	22.1108	27.3694	23.7381	24.4868	2497.69	2092.89	2721.86	3343.34	4.48313e-09	0.756873
ILMN_2702303	Ch25h	CH25H	45.9058	72.6952	48.7993	79.513	180.028	414.468	193.492	301.639	7.21461e-05	1.20069
ILMN_2603647	Clec2d	CLEC2D	1174.7	1443.83	1175.43	1751.99	5448.31	6207.78	5510.04	5633.61	8.48508e-07	1.04599
ILMN_1230708	Clec4a1	CLEC4A1	919.917	1108.2	988.251	898.335	8459.07	7662.78	9277.19	6767.37	1.23728e-07	1.00482
ILMN_3161652	Clec4a3	CLEC4A3	834.228	1245.13	658.267	716.278	3226.66	3771.67	4404.83	4054.54	4.08744e-06	0.827287
ILMN_1216972	Clec4e	CLEC4E	372.473	126.577	316.548	69.8756	3456.29	1373.76	2207.57	1549.23	0.000171725	1.28568
ILMN_1215209	Clecsf9	CLECSF9	1124.3	529.302	812.82	217.145	12967.1	6147.97	9259.89	6038.18	3.16153e-05	1.24951
ILMN_2629581	Cox6a2	COX6A2	62.2571	48.8953	47.7254	71.4744	242.955	336.123	353.912	557.582	9.19736e-06	0.635307
ILMN_3083163	Cp	CP	20.6872	28.7471	22.5702	39.2003	886.625	478.384	833.119	623.81	1.22451e-07	0.936908
ILMN_1255648	Csf3r	CSF3R	135.852	73.8963	110.328	132.404	502.082	603.734	619.149	637.93	2.37668e-06	0.879671
ILMN_2661289	Csprs	CSPRS	22.0358	30.4386	32.6114	71.9383	392.283	560.64	640.422	747.47	1.38667e-06	0.686598
ILMN_1244891	Cst7	CST7	103.794	28.9301	70.5041	23.5771	999.63	513.302	871.995	314.077	0.00014763	1.27558
ILMN_2763245	Cxcl1	CXCL1	134.439	69.8157	91.8603	23.9284	2141.12	2501.14	435.088	748.614	0.000660095	3.92182
ILMN_3142803	Cxcl10	CXCL10	79.8663	299.282	162.651	675.758	24227.2	29571.2	13764.7	7911.16	3.87879e-06	2.48194
ILMN_2811154	Cxcl2	CXCL2	113.251	30.2788	121.392	43.5678	1917.67	1675.71	716.484	856.872	6.61739e-05	2.2839
ILMN_1215862	Cxcl9	CXCL9	27.3006	31.0308	25.4354	55.8326	1646.6	3066.36	5165.68	6518.25	5.2354e-07	0.403372
ILMN_2827780	D14Ertd668e	D14ERTD668E	149.953	325.232	607.069	2010.54	10054.9	13044.8	12685.7	11646.3	2.89348e-05	0.949354
ILMN_2743932	D330014H01Rik	D330014H01RIK	30.2635	25.5394	23.6024	19.8164	107.762	165.727	100.574	203.659	2.21626e-05	0.898944
ILMN_2626939	Daxx	DAXX	373.356	639.252	580.717	1557.96	3872.06	4784.29	2922.03	2651.1	6.06848e-05	1.55323
ILMN_2671460	Dclre1c	DCLRE1C	44.795	51.8431	42.6398	67.2385	245.28	262.185	208.631	156.768	5.36149e-06	1.3888
ILMN_2747959	Dcn	DCN	23.3307	22.2311	21.1143	22.5115	347.173	620.22	336.289	1054.03	2.61597e-06	0.695809
ILMN_2652909	Ddit3	DDIT3	167.115	149.324	199.644	394.911	3374.27	4194.06	2759.81	3756.65	3.17516e-07	1.16142
ILMN_2717127	Ddx58	DDX58	43.7523	108.417	99.3545	230.447	646.984	1010.53	690.63	708.7	4.25423e-05	1.1845
ILMN_2915689	Dhx58	DHX58	340.718	701.446	943.794	2190.16	3448.39	3566.59	3392.8	3410.96	0.000516312	1.03105
ILMN_1250149	Dnmt3l	DNMT3L	78.6072	42.0226	100.202	42.1306	424.034	389.962	340.642	395.728	1.912e-05	1.10542
ILMN_2721385	Dst	DST	33.9544	22.9278	40.0358	30.9757	201.493	153.326	182.29	126.636	5.17985e-06	1.14856
ILMN_2907322	Dtx2	DTX2	594.834	547.729	670.394	493.084	4802.73	4688.33	3823.01	3450.98	3.8424e-07	1.30479
ILMN_3112011	Dusp16	DUSP16	229.475	277.366	240.498	331.174	1236.52	1250.98	1073.26	1083.19	7.29685e-07	1.15351
ILMN_3009243	Dusp2	DUSP2	184.398	149.379	150.875	116.015	1416.59	1560.73	747.47	807.089	1.31576e-05	1.91522
ILMN_2737713	Edn1	EDN1	24.1858	35.1602	23.7496	27.8842	928.358	388.136	286.888	314.318	7.55996e-06	2.18975
ILMN_3162671	EG432555	EG432555	20.8899	54.3027	30.1406	131.161	354.872	597.044	381.586	401.764	2.3687e-05	1.21519
ILMN_2995688	EG433016	EG433016	25.2549	48.5193	22.066	23.7717	486	1210.85	285.65	233.276	2.63004e-05	3.26993
ILMN_2810539	EG630499	EG630499	1054.03	885.635	1210.85	2497.69	7843.48	6785.25	8493.71	10189	3.1586e-06	0.78301
ILMN_2762380	Enpp4	ENPP4	31.8691	29.8491	34.5459	89.1312	985.448	902.055	722.827	428.321	1.54506e-06	1.63967
ILMN_2674475	ENSMUSG00000053338	ENSMUSG00000053338	23.5043	27.3656	20.6176	27.8763	442.096	495.996	394.801	575.319	4.2591e-08	0.966986
ILMN_2707865	Epsti1	EPSTI1	330.818	515.021	580.546	885.903	2743.5	3682.27	2652.4	2609.43	1.25898e-05	1.2212
ILMN_1239717	Expi	EXPI	32.5297	25.3481	21.9405	24.0098	129.911	99.8294	124.525	125.219	2.37683e-06	0.919905
ILMN_2688912	F10	F10	87.5585	57.7308	85.2525	170.427	1372.23	1340.87	1427.09	3131	1.64892e-06	0.595227
ILMN_2708871	F7	F7	37.4306	36.5655	40.6027	74.1311	180.544	219.279	122.466	331.546	0.000152946	0.880642
ILMN_2671266	Fam116b	FAM116B	48.2821	53.4387	69.0136	58.0694	244.257	481.074	198.802	232.892	4.88169e-05	1.68019
ILMN_2902979	Fas	FAS	104.161	119.25	74.6137	57.5235	682.923	574.61	643.451	511.104	1.38667e-06	1.08919
ILMN_1229523	Fcgr1	FCGR1	765.033	1425.55	1343.87	3496.36	10501.9	10604	10189	10010.8	1.38777e-05	1.04486
ILMN_1228657	Fcgr2b	FCGR2B	1028.6	324.767	916.829	385.125	5032.8	4440.2	7911.16	6106.32	3.27431e-05	0.675798
ILMN_2631161	Fcgr4	FCGR4	3001.11	2728.63	4213.23	6365.54	26099.7	31351.2	30787.7	28090.4	1.10695e-06	0.975761
ILMN_2894961	Fgd6	FGD6	193.788	189.551	190.18	272.736	806.156	978.184	915.506	868.799	7.39983e-07	1.00002
ILMN_2654554	Fgl2	FGL2	39.3358	33.4424	33.6275	45.1134	983.614	784.381	544.276	450.519	5.09695e-07	1.77724
ILMN_2926842	Flrt2	FLRT2	212.302	124.423	193.396	202.79	1021.04	1470.87	638.542	668.318	6.36039e-05	1.90679
ILMN_2610944	Fpr1	FPR1	23.5341	20.7144	23.7553	23.3006	660.004	602.738	589.685	452.026	1.603e-08	1.21218
ILMN_1242457	Fpr2	FPR2	90.2602	137.432	53.8908	112.586	10329.1	9240.54	11295.4	10482	2.40081e-08	0.898626
ILMN_1235347	Frag1	FRAG1	442.425	569.341	516.265	937.047	2101.8	2023.67	2309.51	2046.07	6.33856e-06	0.947169
ILMN_1222009	Gab1	GAB1	248.948	238.462	213.046	146.973	793.235	1526.35	1276.22	1525.27	1.16732e-05	0.827982
ILMN_2900653	Gadd45b	GADD45B	218.122	132.986	266.764	245.28	1779.25	1734.51	971.817	1294.15	1.27236e-05	1.55067
ILMN_2808485	Gbp10	GBP10	21.7419	24.4944	22.0614	21.7887	169.118	199.34	140.926	138.84	2.06435e-07	1.31702
ILMN_3122961	Gbp2	GBP2	262.185	417.894	700.761	1445.81	17649.8	25525.4	18462.8	17780.1	1.84116e-06	1.19127
ILMN_1244513	Gbp3	GBP3	170.203	289.216	454.658	887.157	9423.24	11295.4	8585.84	10561.7	2.44502e-06	1.08205
ILMN_1244866	Gbp5	GBP5	21.1259	22.8117	25.2425	37.9385	1213.04	1575.89	760.045	763.473	1.32615e-07	1.83059
ILMN_2860645	Gbp6	GBP6	56.2207	42.7986	76.2921	184.039	1222.67	1741.88	1423.09	1271.74	8.36031e-07	1.10009
ILMN_2733482	Gca	GCA	25.0592	37.9385	22.538	43.2165	115.936	109.245	113.8	114.538	5.93519e-06	0.986172
ILMN_3053593	Glipr2	GLIPR2	124.039	101.012	124.525	101.509	501.33	1075.62	410.461	390.414	8.76694e-05	1.96904
ILMN_2654754	Gp38	GP38	1706.44	290.922	1194.86	576.794	7911.16	8830.1	4842.66	8459.07	0.000330482	1.25858
ILMN_2847115	Gpr109a	GPR109A	45.1923	46.9971	55.3683	49.3807	550.838	478.54	429.851	294.627	7.29979e-07	1.42085
ILMN_1213809	Gpr18	GPR18	21.2192	31.2649	21.9113	22.4321	734.838	323.851	559.779	265.994	1.38667e-06	1.28206
ILMN_2979721	Gpr31c	GPR31C	21.9379	24.3325	26.5002	40.476	637.089	556.161	608.087	400.109	1.05289e-07	1.18355
ILMN_1221121	Gpr35	GPR35	38.9228	27.0535	47.6101	23.4611	123.349	219.682	197.087	220.649	3.20037e-05	0.821168
ILMN_1235042	Gpr85	GPR85	169.825	314.934	186.969	327.022	778.238	729.247	862.001	961.269	1.43793e-05	0.826803
ILMN_2680533	Gstt1	GSTT1	21.0166	21.149	25.8613	29.085	596.436	447.877	902.423	428.174	2.59366e-07	0.784846
ILMN_1217133	Gstt4	GSTT4	22.4654	19.7823	24.5358	21.4781	306.865	134.683	324.767	203.509	1.86806e-06	0.835829
ILMN_1256281	Gtpbp8	GTPBP8	58.7571	72.5694	64.225	92.7965	245.573	271.327	290.065	240.637	2.04191e-06	0.973992
ILMN_3120510	Gvin1	GVIN1	260.612	1062.46	999.088	1420.01	5468.07	6422.41	4878.23	4502.05	0.000245362	1.2676
ILMN_2729386	H2-D4	H2-D4	48.3023	34.8915	51.4851	66.4591	209.369	305.641	306.735	226.183	3.40779e-06	0.966395
ILMN_2795520	H2-K1	H2-K1	190.076	232.058	231.745	436.375	1632.22	1658.73	1858.74	2170.59	1.04075e-06	0.816748
ILMN_2964185	H2-M2	H2-M2	126.557	49.1414	39.6908	188.481	4235.91	1071.52	1898.43	7508.88	4.36085e-05	0.564182
ILMN_2685581	H2-Q5	H2-Q5	36.7859	42.6471	35.0144	54.5398	147.401	152.714	186.497	173.335	1.77706e-06	0.834039
ILMN_2924419	H2-Q7	H2-Q7	866.598	898.335	1140.06	2548.79	6518.25	6451	7586.18	8875.75	6.33227e-06	0.787833
ILMN_2951592	H2-Q8	H2-Q8	173.496	151.634	250.111	528.607	3183.52	3337.14	4814.83	5255.4	1.20566e-06	0.647519
ILMN_2894678	H2-T10	H2-T10	31.8374	43.8768	39.7378	80.9769	452.726	625.1	584.086	585.786	4.36799e-07	0.921321
ILMN_2777471	H2-T23	H2-T23	3620.78	3610.77	5299.89	10293.8	21936.8	22759.2	23496.9	26490.5	1.60392e-05	0.894146
ILMN_1229173	H2-T24	H2-T24	22.8117	31.672	38.7736	113.381	314.403	280.31	334.96	234.824	2.21188e-05	1.04375
ILMN_2965903	Hdc	HDC	37.7718	35.1787	49.9481	56.2784	512.645	618.871	319.092	312.914	2.46207e-06	1.79035
ILMN_2788073	Hmox1	HMOX1	3482.64	1531.14	3608.35	3168.92	16474.2	13344.1	15686	19695.7	9.87331e-06	0.842761
ILMN_2944824	Hp	HP	70.9778	30.3138	34.8048	31.7119	2446.15	2054	2299.36	2764.67	1.32615e-07	0.888651
ILMN_2829594	Hspa1a	HSPA1A	35.0144	30.2643	46.2708	42.1639	586.751	660.648	235.53	262.004	2.50804e-05	2.50716
ILMN_2654682	Hspa1l	HSPA1L	20.534	22.9947	23.2999	31.6412	99.4606	154.232	86.8543	90.5518	7.47839e-06	1.43001
ILMN_2589768	Htr2b	HTR2B	154.792	119.648	192.918	512.821	653.452	1315.72	861.496	1038.66	0.000124167	1.03632
ILMN_1241443	Ifi203	IFI203	27.2757	25.4104	45.3914	49.3723	165.556	171.028	121.05	134.557	3.37894e-05	1.31681
ILMN_3010089	Ifi204	IFI204	32.0489	39.5899	120.725	95.8491	445.942	738.405	610.309	384.473	0.000164451	1.19056
ILMN_1245200	Ifi205	IFI205	22.499	26.3025	22.7809	28.3095	1659.9	1727.66	1329.28	1085.31	1.48261e-08	1.40296
ILMN_2625290	Ifi35	IFI35	381.014	489.727	701.446	1317.24	3014.56	3454.16	2853.29	2615.9	4.48656e-05	1.18276
ILMN_2652857	Ifi47	IFI47	128.084	706.144	726.373	1748.01	5363.77	7302.9	6185.64	5584.55	0.000343651	1.07617
ILMN_2981167	Ifit2	IFIT2	100.784	473.075	525.776	1642.26	18790.9	23041.1	18132.7	14001.8	2.24531e-05	1.30178
ILMN_2944666	Ifit3	IFIT3	330.178	1887.72	2461.31	11550.4	35910.5	42420.1	31823.4	36330.5	0.000337863	1.14932
ILMN_1218181	Ifitm6	IFITM6	206.061	353.237	291.401	333.145	1032.46	1653.6	1057.43	988.703	1.63209e-05	1.31275
ILMN_2711910	Ifnb1	IFNB1	22.6239	22.402	21.458	23.2659	714.333	1429.03	185.144	153.751	0.000242262	6.32458
ILMN_2974720	Igf2bp2	IGF2BP2	695.411	724.422	582.944	1520.42	4365.68	4916.05	2927.74	4143.13	1.65681e-05	1.31267
ILMN_2764588	Igfbp7	IGFBP7	48.6372	55.6865	29.3966	39.8611	374.536	516.571	174.976	583.454	8.28055e-05	1.17494
ILMN_2804166	Igsf9	IGSF9	94.8771	89.7642	81.4816	151.267	1069.29	1763.66	690.975	686.198	6.08491e-06	2.05707
ILMN_2593554	Igtp	IGTP	252.05	603.93	506.773	1417.2	7628.5	11176.8	7218.78	6697.02	7.33598e-06	1.35137
ILMN_1259564	Iigp2	IIGP2	239.253	1142.31	538.686	2407.36	7508.88	9924.16	7080.5	8193.47	6.36039e-05	1.14136
ILMN_3161543	Ikbke	IKBKE	185.952	172.764	111.993	200.159	921.696	763.019	893.111	792.029	3.40779e-06	0.999748
ILMN_1238505	Il10	IL10	43.9764	252.303	66.9053	221.325	843.311	834.228	455.637	486.588	0.000312314	1.7804
ILMN_2610234	Il15	IL15	323.851	809.551	531.976	1153.51	4206.21	6747.36	3610.77	3377.96	2.5858e-05	1.56732
ILMN_1249759	Il15ra	IL15RA	39.9773	35.5458	35.3166	37.1918	469.912	665.865	320.281	272.385	1.71197e-06	1.91638
ILMN_1227018	Il1a	IL1A	23.6497	23.1014	28.2069	21.6751	1690.56	1140.06	675.215	966.77	2.28706e-07	1.7239
ILMN_2777498	Il1b	IL1B	116.765	52.5569	64.0026	26.0462	10631.9	6259.73	7161.54	6342.48	2.06435e-07	1.25086
ILMN_3072427	Il1rn	IL1RN	137.432	96.5305	137.921	308.583	13406.9	17171.7	15769	19224.1	2.21748e-08	0.873849
ILMN_2886646	Il2rg	IL2RG	238.28	170.281	139.068	178.764	961.775	979.216	1047.04	867.507	3.25954e-06	1.01381
ILMN_2738433	Il4ra	IL4RA	37.5704	21.7217	44.1239	25.5802	133.928	201.493	178.875	203.232	1.29683e-05	0.87782
ILMN_2868220	Inhba	INHBA	26.5743	28.1091	32.1662	26.1338	1280.67	1050.5	503.744	1566.06	1.22416e-06	1.12628
ILMN_2677859	Insl6	INSL6	552.534	564.789	582.128	696.184	2397.38	2990.31	2548.79	2834.94	5.09695e-07	1.00074
ILMN_1253972	Irak3	IRAK3	509.675	837.908	680.769	613.813	3954.17	2834.94	4025.88	2784.9	2.81405e-06	0.996819
ILMN_2834777	Irf1	IRF1	1225.2	2467.15	1315.72	2534.04	7470.8	11977.1	6653.41	7470.8	2.13468e-05	1.37692
ILMN_1227573	Irf7	IRF7	49.4268	181.81	191.356	1452.36	8107.44	9277.19	8629.17	8039.92	2.89376e-05	1.04293
ILMN_2735615	Isg20	ISG20	26.8114	48.7538	60.1842	114.266	1820.04	2303.57	1924.46	1471.58	7.12774e-07	1.21424
ILMN_1245579	Jak2	JAK2	441.815	414.468	547.729	407.303	2076.87	2479.91	1928.85	2245.22	1.12207e-06	1.09169
ILMN_2915671	Kcnab1	KCNAB1	24.8456	22.2694	25.8156	23.2832	169.955	352.185	222.205	287.001	8.27173e-07	1.0254
ILMN_2593410	Kif3c	KIF3C	134.496	285.508	149.559	394.157	1123.77	761.476	789.957	970.062	4.17668e-05	1.07115
ILMN_2814974	Klra2	KLRA2	33.4649	30.1557	25.2993	42.1959	377.043	467.41	468.354	358.342	1.1995e-07	1.02148
ILMN_2678580	Lass6	LASS6	103.3	68.8554	98.2622	115.51	441.611	523.361	406.378	344.121	3.35396e-06	1.28577
ILMN_2712075	Lcn2	LCN2	33.3757	29.1623	22.2619	32.5487	9745.73	14834.2	15133.4	23295.2	1.48261e-08	0.639626
ILMN_2752873	Lgals9	LGALS9	292.712	275.207	438.62	890.933	2144.78	2446.15	2054	2034.09	1.55926e-05	1.123
ILMN_1256257	LOC100038882	LOC100038882	233.606	1101.07	1164.01	4994.25	33143	33700.3	25525.4	21183.5	6.47993e-05	1.43106
ILMN_1214731	LOC100044190	LOC100044190	1052.32	1116.3	1157.04	1855.3	13864.6	15686	17649.8	16474.2	8.98727e-08	0.865978
ILMN_2595732	LOC100046232	LOC100046232	211.326	325.371	223.919	301.836	1204.7	2028.35	1566.83	1409.26	1.59135e-06	1.08634
ILMN_2478101	LOC100047963	LOC100047963	430.685	372.183	475.629	932.077	2554.97	3148.82	2214.78	2171.96	6.54225e-06	1.30024
ILMN_2433990	LOC100048346	LOC100048346	95.4024	463.836	464.497	2436.82	13344.1	16763.2	13044.8	12685.7	5.41502e-05	1.1701
ILMN_1238886	LOC100048554	LOC100048554	22.1553	19.9783	21.0029	31.816	2221.45	4344.87	2316.3	2779.58	1.58973e-08	1.28856
ILMN_2771766	LOC100048556	LOC100048556	176.254	45.8825	215.308	165.727	13126.5	18987.7	10429	8178.69	5.61073e-07	1.72586
ILMN_2783223	LOC435565	LOC435565	22.6244	21.4442	21.8029	101.012	512.497	616.467	500.542	568.461	1.7194e-06	1.05609
ILMN_2845658	LOC625360	LOC625360	21.601	77.6808	22.6336	157.101	708.346	1322.29	930.172	767.111	1.27441e-05	1.1964
ILMN_1246194	LOC667370	LOC667370	36.7638	221.083	239.963	1467.12	8342.42	9960.13	7000.47	5649.39	0.000107699	1.44686
ILMN_2997494	Lox	LOX	30.6352	22.2388	25.8142	22.1198	1020.21	206.179	442.957	374.536	1.06474e-05	1.50018
ILMN_2715800	Lrrc25	LRRC25	112.171	73.5916	137.071	140.764	808.39	646.538	631.888	600.189	1.99686e-06	1.18087
ILMN_2744193	Lrrc8	LRRC8	42.6172	39.4684	37.3848	28.872	137.037	163.471	224.109	211.326	5.82087e-06	0.690133
ILMN_2609323	Lst1	LST1	3136.36	4059.21	2946.4	3778.91	12235.7	14001.8	13487.6	14666.4	1.04208e-06	0.931931
ILMN_1255416	Ly6a	LY6A	73.2139	1333.01	192.568	4292.52	14145.8	34531.4	22251.3	27199.1	0.000107819	0.984365
ILMN_2984828	Ly6e	LY6E	594.275	1170.83	1227.24	5184.82	5271.72	7024.78	6747.36	7055.21	0.000415483	0.890885
ILMN_1245924	Map3k8	MAP3K8	171.714	220.326	204.573	148.72	884.244	991.084	655.551	717.041	4.77478e-06	1.36627
ILMN_2918977	March1	MARCH1	121.86	214.538	84.0934	207.653	1460.85	1183.11	1610.24	1483.25	1.54017e-06	0.854686
ILMN_1229922	Marco	MARCO	44.1163	28.3915	22.3015	28.7668	1064.37	618.14	208.41	159.142	0.000419101	4.57763
ILMN_2702141	Mefv	MEFV	85.8423	71.5754	112.13	88.0983	770.691	681.428	1022.78	832.253	3.93836e-07	0.782798
ILMN_2766105	Mfsd7a	MFSD7A	134.557	85.9884	103.641	115.145	673.621	692.719	805.553	759.625	4.3148e-07	0.872962
ILMN_1241965	Mitf	MITF	48.2085	85.8423	50.5209	97.1387	219.604	305.683	239.528	190.076	2.71741e-05	1.22272
ILMN_2737685	Mmp13	MMP13	2000.73	451.436	2579.26	1426.57	9960.13	17780.1	8178.69	9240.54	0.000387933	1.59251
ILMN_1240726	Mmp14	MMP14	834.881	112.38	531.529	115.11	9277.19	5921.76	9581.59	7982.21	5.51962e-05	0.865356
ILMN_2915279	Mov10	MOV10	28.3689	46.3049	25.3536	80.3609	368.454	430.387	218.319	291.804	1.17574e-05	1.56598
ILMN_1254692	Ms4a6b	MS4A6B	54.6815	44.8309	111.132	95.6026	700.035	882.156	906.814	801.836	2.84588e-06	0.925989
ILMN_2772710	Ms4a6c	MS4A6C	171.112	112.075	160.296	189.023	619.736	748.208	731.075	544.52	3.78451e-06	1.0724
ILMN_1241695	Ms4a6d	MS4A6D	8231.58	6271.89	10693.5	8412.11	33700.3	40064.8	39200.2	34911.6	3.32116e-06	0.995323
ILMN_2707870	Mx1	MX1	22.9692	26.1967	40.6197	95.1107	2073.4	2320.48	1743.45	981.285	8.05392e-07	1.61259
ILMN_1239219	Mx2	MX2	27.4937	105.181	120.222	306.865	2912.56	3571.79	1556.12	1577.27	5.82937e-05	2.06944
ILMN_1224997	Mxd1	MXD1	24.2052	19.6866	23.177	25.0103	297.241	540.333	182.232	120.262	2.87562e-05	2.76889
ILMN_2722938	Myd116	MYD116	101.631	56.0042	99.4606	109.399	628.119	601.186	282.924	421.661	9.60624e-05	1.74472
ILMN_2755008	Nfkbiz	NFKBIZ	213.67	247.225	159.586	195.033	2365.05	2155.21	1179.77	1402.74	4.44691e-06	1.75033
ILMN_1247710	Nod1	NOD1	94.2336	186.461	100.84	263.176	2283.11	2877.3	2527.47	2538.07	3.94027e-07	1.01873
ILMN_1223499	Nos2	NOS2	20.9104	23.6453	25.6068	22.3401	813.309	1192.38	449.234	377.287	1.09029e-06	2.42667
ILMN_2663374	Nr1h3	NR1H3	697.592	765.721	630.87	1216.51	5657.84	5002.37	5769.73	7809.1	6.86701e-07	0.785061
ILMN_2603081	Nt5c3	NT5C3	753.631	833.119	823.433	1431.35	5592.88	7602.15	5255.4	4860.48	1.26058e-06	1.30439
ILMN_2742042	Nupr1	NUPR1	277.366	319.092	349.852	556.161	4966.09	7132.55	7055.21	7353.8	1.32615e-07	0.839658
ILMN_2924839	Oas1a	OAS1A	26.6625	48.1519	44.3639	97.7413	256.758	248.655	255.754	214.448	2.16004e-05	1.07489
ILMN_2613140	Oas1b	OAS1B	26.2728	23.3049	27.0192	50.6629	168.31	271.938	139.892	182.652	5.95554e-06	1.36492
ILMN_1253808	Oas1g	OAS1G	1283.26	3205.28	3215.66	7880.24	16169.7	15815	14834.2	16331	0.000184871	1.02629
ILMN_2670150	Oas2	OAS2	107.986	404.046	377.939	811.809	1257.24	2108.94	1501.74	1704.99	0.000887564	1.04972
ILMN_1216020	Oas3	OAS3	31.3673	33.143	62.8125	182.488	390.141	441.611	424.493	475.629	4.54175e-05	0.924044
ILMN_2793464	Oasl1	OASL1	31.0197	74.0693	83.223	546.348	11244.9	16331	7334.41	7431.33	3.92534e-06	1.86756
ILMN_2599154	Oasl2	OASL2	22.7432	79.513	75.8858	359.081	726.594	797.253	540.333	820.452	0.00030119	1.11983
ILMN_2789762	ORF9	ORF9	20.4559	25.8109	21.4706	22.1144	76.8371	161.211	113.229	130.506	7.45017e-06	0.976668
ILMN_1226935	Orm1	ORM1	29.0411	22.5845	25.7676	31.6548	134.196	111.457	113.522	422.272	0.000239177	0.458482
ILMN_2864309	OTTMUSG00000000971	OTTMUSG00000000971	3585.42	1480.5	2363.79	918.048	12452.8	11056.8	13126.5	13126.5	6.47993e-05	0.895499
ILMN_1219200	P2ry14	P2RY14	663.475	921.953	560.004	616.091	2669.69	3908.88	2784.9	2309.51	6.06775e-06	1.29133
ILMN_1228913	Parp12	PARP12	220.919	350.792	475.329	739.439	2245.22	2743.5	1971.02	1886.25	4.24597e-05	1.29333
ILMN_2825803	Parp14	PARP14	1039.16	3115.8	2617.95	7334.41	13764.7	14056.6	10604	13344.1	0.000387416	1.16174
ILMN_2747728	Pde7b	PDE7B	23.7265	30.8146	27.0519	33.1001	169.065	275.353	239.65	170.459	8.09437e-07	1.08366
ILMN_1239770	Peli1	PELI1	144.523	113.636	168.916	134.196	707.01	1351	427.086	448.047	0.000322006	2.35165
ILMN_2696492	Phf11	PHF11	31.5981	86.6462	91.1636	355.936	5649.39	8178.69	6167.97	5813.4	2.29024e-06	1.15413
ILMN_2910768	Pilra	PILRA	89.4969	60.1673	65.1255	80.7685	378.345	233.061	538.012	380.039	1.68132e-05	0.665983
ILMN_1259100	Pilrb1	PILRB1	97.8841	94.0431	94.4744	103.767	729.247	326.137	839.536	469.912	1.45471e-05	0.805977
ILMN_2702406	Pim1	PIM1	42.0499	24.1115	48.8121	41.4518	277.026	262.004	228.963	140.509	1.72074e-05	1.45892
ILMN_2692696	Pla2g7	PLA2G7	218.386	159.93	333.929	243.868	1247.3	1439.21	1860.49	1588.23	5.17201e-06	0.778988
ILMN_2988143	Plac8	PLAC8	34.841	25.6466	30.229	44.1647	335.673	1541.53	402.54	560.08	1.19627e-05	1.9501
ILMN_1228330	Plcl2	PLCL2	262.806	383.675	272.385	424.493	1314.19	1479.08	1149.96	1363.65	2.88637e-06	1.11126
ILMN_2841024	Pnpla1	PNPLA1	34.8224	38.3201	30.7629	64.278	151.228	234.905	241.649	222.316	5.95554e-06	0.832245
ILMN_2687602	Pou2f2	POU2F2	71.5299	315.465	86.3581	271.113	724.806	579.163	736.682	939.257	0.000127414	0.778053
ILMN_1233172	Pou3f1	POU3F1	24.7667	33.7881	38.0642	64.9858	1670.24	3234.2	994.335	1012.96	1.18421e-06	2.44331
ILMN_2630993	Ppap2b	PPAP2B	527.575	65.0921	366.846	139.801	2188.57	1860.49	1418.75	2108.94	0.000936299	1.1478
ILMN_2964841	Ppfibp2	PPFIBP2	87.982	158.763	91.8357	132.063	860.063	607.267	457.759	536.031	1.1107e-05	1.4765
ILMN_1214471	Ppm1h	PPM1H	71.2468	62.4809	83.9498	111.841	349.963	322.707	414.024	366.092	1.61311e-06	0.862269
ILMN_2904658	Procr	PROCR	32.4227	32.8477	35.2016	26.7061	163.664	155.723	102.141	151.944	8.25614e-06	1.25701
ILMN_1223571	Ptger2	PTGER2	62.3614	88.8163	56.0798	50.3767	254.634	337.204	352.409	317.294	1.88248e-06	0.883732
ILMN_2786442	Ptges	PTGES	37.7008	28.113	25.9254	27.595	1352.96	954.689	565.488	778.238	5.2354e-07	1.71735
ILMN_2637398	Rabl5	RABL5	338.538	381.888	354.781	539.882	1771.45	1845.05	1622.22	1567.68	9.57419e-07	1.13373
ILMN_1246609	Rasgrp1	RASGRP1	34.2865	26.1831	22.764	24.2169	732.702	460.198	807.089	623.452	1.10445e-07	0.83388
ILMN_2717176	Rgl1	RGL1	1175.9	326.413	1055.77	194.361	4916.05	7281.08	4399.41	5110.05	0.000368658	1.28263
ILMN_3080300	Rin2	RIN2	41.496	63.4978	55.0094	56.6469	271.198	455.637	332.724	232.498	3.94285e-06	1.28593
ILMN_1238612	Rnf114	RNF114	292.076	494.724	409.685	743.004	1716.86	1965.93	1704.99	1405.49	2.39514e-05	1.184
ILMN_2820379	Rnf135	RNF135	888.873	1944.73	820.678	2095.76	4636.12	5957.45	4259.84	4133.13	6.74572e-05	1.2622
ILMN_2595387	Rnf31	RNF31	93.3742	228.963	117.204	406.152	825.94	1054.69	698.475	782.639	7.62122e-05	1.26974
ILMN_2649810	Rpl3l	RPL3L	36.9941	34.1891	29.612	35.1638	106.653	149.692	123.991	225.871	2.99817e-05	0.732704
ILMN_1225204	Rsad2	RSAD2	294.215	931.554	1208.61	4545.88	44148.5	44540.7	38146.2	39483.2	1.40067e-05	1.14247
ILMN_2710905	S100a8	S100A8	741.188	647.373	675.568	457.536	4241.96	4043.58	6785.25	7409.72	2.04413e-06	0.583696
ILMN_2772632	Saa3	SAA3	503.996	225.583	298.568	800.016	43035.9	40535	41441	43691.3	4.79664e-08	0.981658
ILMN_1221736	Samhd1	SAMHD1	1164.23	1394.93	1643.03	2725.1	8205.05	8853.35	7880.24	8481.42	3.38226e-06	1.04258
ILMN_2646322	Samsn1	SAMSN1	411.737	1034.35	335.769	776.03	2207.57	1730.01	2472.94	1687.65	0.000105465	0.946398
ILMN_3009860	Sell	SELL	21.7335	19.9824	23.324	22.3302	192.517	608.472	162.59	217.415	1.39484e-05	2.10784
ILMN_1252204	Sepw1	SEPW1	293.564	304.7	339.389	536.431	1959	1744.48	1566.06	1546.94	1.7176e-06	1.18968
ILMN_2742861	Serpina3f	SERPINA3F	21.3464	24.7561	22.4046	22.1067	94.9603	171.714	157.925	160.6	2.29024e-06	0.837215
ILMN_2725927	Serpina3g	SERPINA3G	23.8835	23.3404	30.492	27.6084	628.679	899.545	704.666	473.209	7.16119e-08	1.29744
ILMN_1253874	Serpinb2	SERPINB2	23.9629	20.466	22.1388	23.0358	234.127	215.978	302.631	166.689	3.85791e-07	0.959057
ILMN_2762966	Siglec1	SIGLEC1	124.566	293.712	249.895	1009.15	4118.61	5116.78	3816.12	4749.96	1.22759e-05	1.07814
ILMN_2763679	Sipa1l1	SIPA1L1	393.676	444.397	374.412	504.347	1450.84	1944.73	1745.79	1571.58	1.39402e-06	1.02357
ILMN_3154691	Sirpb1	SIRPB1	711.788	1704.99	1049.04	1950.93	9071.97	10661.8	13072.4	9038.99	3.94285e-06	0.89247
ILMN_2638491	Slamf7	SLAMF7	165.686	83.5353	177.985	150.417	2636.45	2593.61	2141.12	1888.96	2.59366e-07	1.29775
ILMN_2598622	Slamf8	SLAMF8	52.7896	32.7676	37.2436	80.1211	767.111	592.169	623.452	806.801	3.37559e-07	0.950377
ILMN_2663249	Slamf9	SLAMF9	2046.07	2508.73	2365.05	6799.43	25525.4	23295.2	24227.2	20980.1	2.63472e-06	1.07993
ILMN_2722579	Slc13a3	SLC13A3	102.423	76.7267	91.7368	72.8525	2601.33	932.077	1367.29	670.974	1.1107e-05	1.73354
ILMN_2987709	Slc15a3	SLC15A3	3427.41	1445.81	2983.89	3810.17	22531	20980.1	20708.3	21483.5	1.86806e-06	1.03127
ILMN_2843286	Slc28a2	SLC28A2	23.7113	33.4959	37.5889	49.5901	1054.69	1370.88	979.536	561.21	4.24807e-07	1.57429
ILMN_2634656	Slc31a2	SLC31A2	245.79	270.841	374.536	331.546	2450.06	1630.67	1585.72	2218.61	3.16602e-06	1.07265
ILMN_2591713	Slc36a1	SLC36A1	78.2747	53.4694	62.4809	45.4044	294.543	333.5	306.483	298.017	1.59608e-06	1.03894
ILMN_2948143	Slc7a11	SLC7A11	103.439	25.0779	71.6286	26.7288	444.397	357.303	286.183	333.929	0.000297391	1.29283
ILMN_2642349	Slc7a2	SLC7A2	60.0697	51.5112	53.3262	91.0089	597.833	658.267	405.25	1281.79	1.12e-05	0.744559
ILMN_2663230	Slco3a1	SLCO3A1	106.48	84.6133	117.052	71.9999	1790.09	2410.63	1228.05	1397	3.93836e-07	1.60024
ILMN_2663930	Slfn1	SLFN1	23.8334	34.0101	25.1823	269.855	4571.7	6223.08	6985.11	6725.02	8.2728e-07	0.787358
ILMN_1256817	Slpi	SLPI	203.166	23.2456	167.428	52.5119	2410.63	2438.61	3427.41	2641.53	3.05885e-05	0.799025
ILMN_1227282	Soat2	SOAT2	32.2858	29.8614	28.7917	28.89	153.706	479.787	357.303	435.741	1.28251e-05	0.798812
ILMN_2618176	Socs3	SOCS3	556.558	95.5493	419.504	55.9855	8219.74	8092.21	7628.5	9014.53	3.11873e-05	0.980107
ILMN_2650280	Sod2	SOD2	5897.96	4814.83	5401.57	3063.76	29099.4	18671.7	26899.8	25799.7	4.42089e-06	0.906483
ILMN_2846812	Sp100	SP100	42.7022	61.1736	58.3011	218.507	421.765	453.602	433.269	428.516	2.87562e-05	1.01576
ILMN_3162887	Sp140	SP140	46.3277	77.5794	60.7233	127.01	906.814	1210.28	720.565	468.976	4.77478e-06	1.77976
ILMN_2854004	Spic	SPIC	49.0319	26.5382	41.7175	29.2738	1335.38	1141.83	1517.27	2433.85	1.32615e-07	0.626967
ILMN_3148543	Src	SRC	89.602	26.0119	96.6082	51.5528	517.089	460.504	323.99	427.086	9.75246e-05	1.30159
ILMN_2655721	Stat1	STAT1	495.576	812.82	1002.77	1928.85	4246.65	4976.14	4410.18	4708.29	5.00591e-05	1.01144
ILMN_2657822	Stat2	STAT2	44.8522	142.545	122.039	397.22	1477.14	1902.21	1467.12	1693.77	3.28032e-05	1.06912
ILMN_1235133	Syn1	SYN1	88.4184	75.1513	67.098	115.983	407.038	566.99	517.312	604.305	1.38667e-06	0.868414
ILMN_1250409	Tap1	TAP1	92.6654	103.554	143.148	397.079	1174.7	1217.81	933.68	1179.85	1.30011e-05	1.132
ILMN_2686721	Tap2	TAP2	1150.99	1751.99	1593.21	1984.38	5510.04	5865.39	5993.98	6147.97	4.57347e-06	0.93687
ILMN_1226819	Tapbp	TAPBP	182.415	201.001	262.581	487.114	1294.15	1310.86	1105.53	695.051	6.57176e-05	1.44676
ILMN_2754158	Tgtp	TGTP	27.0141	25.4407	21.5934	36.921	294.215	497.535	264.088	284.445	4.93875e-07	1.44339
ILMN_2659151	Thbs1	THBS1	95.1107	25.0186	85.2948	20.8574	978.184	1595.44	693.016	259.006	0.000426179	2.70333
ILMN_3103896	Timp1	TIMP1	143.794	205.007	107.797	122.251	792.228	4598.08	1392.13	7111.04	0.000306244	0.633917
ILMN_1236908	Tlr1	TLR1	100.081	200.805	118.093	356.428	1076.14	1010.09	1302.4	1089.43	7.96568e-06	0.872231
ILMN_2732604	Tmcc3	TMCC3	24.4714	30.5441	33.215	51.0264	139.595	128.272	154.908	70.828	0.000115024	1.18664
ILMN_2650475	Tmem178	TMEM178	50.6448	30.45	67.0727	72.4655	280.86	256.758	208.07	247.225	1.56381e-05	1.18081
ILMN_1252202	Tnfaip3	TNFAIP3	208.951	120.846	324.211	79.1358	1025.06	1178.54	704.404	737.238	0.000491922	1.52853
ILMN_2486186	Tnfrsf1b	TNFRSF1B	196.534	108.389	174.906	108.112	1801.03	1761.07	1674.89	1244.43	6.90294e-07	1.22018
ILMN_2436146	Tnfsf10	TNFSF10	23.9815	32.2689	24.299	30.9848	132.573	209.854	86.0283	82.4525	7.70458e-05	2.03244
ILMN_2503052	Tnnc1	TNNC1	67.9633	24.2552	64.8405	42.5932	286.602	377.939	404.331	473.734	1.46853e-05	0.756826
ILMN_2422743	Tor3a	TOR3A	213.837	232.812	226.806	492.919	1497.99	1665.95	1249.19	998.688	8.56405e-06	1.40752
ILMN_1230586	Traf1	TRAF1	120.177	122.813	93.5254	94.6325	2171.96	1996.78	1387.89	1533.02	1.33948e-07	1.4272
ILMN_2833441	Trafd1	TRAFD1	1202.07	1726.45	1883.88	3538.16	6697.02	7911.16	6824.95	6785.25	3.92174e-05	1.07333
ILMN_2915303	Trem3	TREM3	46.1869	60.0401	65.3075	43.1713	458.083	439.818	537.736	417.894	2.933e-07	0.939591
ILMN_2509737	Trex1	TREX1	447.083	1272.44	754.677	2538.07	6785.25	7431.33	5856.04	5808.52	4.74722e-05	1.21878
ILMN_1225528	Trib3	TRIB3	177.646	87.0109	216.111	76.4349	811.809	1222.13	917.595	1179.77	2.7601e-05	0.969761
ILMN_3139158	Trim21	TRIM21	260.324	613.012	376.703	965.812	1892.34	3255.73	1847.68	1801.03	0.000101758	1.41093
ILMN_1229630	Trim30	TRIM30	257.945	646.538	662.607	1191.24	2954.13	4054.54	2957.46	2924.15	0.000124044	1.19162
ILMN_1240864	Tyki	TYKI	116.996	549.853	527.351	1639.73	20980.1	27028.8	13951.5	14192.9	2.20651e-05	1.70581
ILMN_2486267	Ube2l6	UBE2L6	275.082	469.912	539.882	1392.75	2163.75	2197.84	2032.97	1604.84	0.000324312	1.19896
ILMN_2959291	Upp1	UPP1	124.382	49.2774	140.104	48.1902	3109.56	2592.45	1845.05	979.216	1.22094e-05	2.01894
ILMN_3131679	Usp18	USP18	188.731	1050.5	871.995	4049.64	23688.8	32076.8	22842	20434.1	5.38517e-05	1.2886
ILMN_2486573	Vegfc	VEGFC	74.0693	79.4325	72.9845	114.816	993.505	558.484	542.937	388.266	8.885e-06	1.66665
ILMN_2879614	Zbp1	ZBP1	111.24	127.354	97.6988	143.259	1088.72	1152.72	1209.12	976.445	8.98727e-08	1.02557
ILMN_2856095	Zc3h12a	ZC3H12A	182.822	108.878	169.194	94.8771	911.939	769.289	442.425	604.114	0.00011852	1.60646
ILMN_2492500	Zeb1	ZEB1	35.3946	51.4851	39.7951	47.7254	183.43	265.104	159.93	128.742	1.36621e-05	1.55378
ILMN_2429754	Zfp313	ZFP313	219.279	325.932	306.229	495.079	1253.59	1557.96	1314.9	1002.44	1.504e-05	1.21326
ILMN_3162407	Zfp36	ZFP36	1527.3	2929.43	1987.19	3355.44	8949.78	12896	7541.18	8768.6	2.84916e-05	1.33943
